# Supplementary material for: The Arabidopsis active demethylase ROS1 cis-regulates defence genes by erasing DNA methylation at promoter-regulatory regions
Source: eLife. 2021 Jan 20;10:e62994. doi: 10.7554/eLife.62994 (PMC7880685; doi:10.7554/eLife.62994)
Supplement: Figure 1—source data 1. [file elife-62994-fig1-data1.xlsx]

## Sheet: Feuil1
Figure 1- Source Data 1
Figure 1A	Bacterial propagation in secondary veins Col-0/ros1-3/ros1-4
	Rep1					Rep2					Rep3
	Col-0	ros1-3	ros1-4			Col-0	ros1-3	ros1-4			Col-0	ros1-3	ros1-4
	5	11	8			4	10	8			2	7	10
	6	7	9			3	9	6			4	11	12
	5	9	3			5	11	7			5	7	8
	4	8	6			6	9	9			8	8	6
	4	6	12			6	11	5			3	6	8
	2	6	8			9	11	10			3	7	6
	4	7	7			4	11	9			5	10	2
	5	9	7			4	12	9			0	4	7
	6	10	10			2	8	11			3	5	4
	3	10	4			4	6	5			1	3	11
						6	8	10			2	7	4
						5	6	5			1	3	3
						5	8	7			5	9	7
						6	7	9			4	7	1
						4	2	11			2	8	4
											1	5	1
Figure 1C	Growth curve Col-0/ros1-3/ros1-4
	Rep1					Rep2					Rep3
	Col-0	ros1-3	ros1-4			Col-0	ros1-3	ros1-4			Col-0	ros1-3	ros1-4
	5.23045	6.20412	6.04139			4.25527	5.77815	5.11394			5.69897	6.14613	5.90309
	4.95424	6.47712	6			3.69897	5.69897	5.11394			5.8451	6.14613	6.04139
	5.04139	5.77815	6.38021			4.14613	5.25527	5.04139			5.5682	6	6.20412
	5.14613	6.07918	6.11394			5.25527	5.30103	5.36173			5.47712	5.69897	5.61278
	5.90309	6	5.90309			4.44716	5.49136	5			5.54407	5.69897	5.43136
	5.60206	6	6.23045			5	5.90309	6.17609
Figure 1D	Bacterial propagation in secondary veins Col-0/ros1-3/dcl23/ros1dcl23
	Rep1						Rep2						Rep3
	Col-0	ros1-3	dcl23	ros1dcl23			Col-0	ros1-3	dcl23	ros1dcl23			Col-0	ros1-3	dcl23	ros1dcl23
	4	9	1	1			6	12	6	12			7	8	2	6
	2	7	0	0			9	16	10	12			7	10	5	3
	0	2	1	1			9	15	13	14			6	8	5	8
	2	3	1	2			8	12	8	7			10	7	6	5
	2	5	2	0			9	13	12	11			9	11	9	9
	1	1	1	1			11	14	8	9			4	13	3	10
	1	10	0	3			11	15	11	8			4	10	9	11
	1	0	1	3			9	14	10	10			7	17	4	9
	2	2	4	1			12	14	11	11			4	12	6	9
	4	3	1	1			11	10	10	7			6	8	5	7
							12	12	7	8			0	10	1	9
							5	13	10	11
							9	10	5	12
							6	10	5	7
Figure 1F	Growth curve Col-0/ros1-3/ros1dcl23
	Rep1					Rep2					Rep3
	Col-0	ros1-3	ros1dcl23			Col-0	ros1-3	ros1dcl23			Col-0	ros1-3	ros1dcl23
	5.47712	6.32222	5.716			4.25527	5.77815	4.07918			5.69897	5.77815	5.47712
	4.47712	6.41497	4.95424			3.69897	5.69897	5.72428			5.8451	5.90309	5.60206
	5.49136	6.14613	5			4.14613	5.25527	5.63347			5.5682	6.14613	5.77815
	5.07918	6.07918	5.11394			5.25527	5.30103	5.20412			5.47712	6.14613	6
	5.44716	6.04139	5.8451			5.44716	5.49136	4.90309			5.54407	6	5.90309
	5	5.60206	5.11394			5	5.90309	5.69897				5.69897	6.20412
	4.77815	5.90309	4.90309
	4.8451	5.77815	4.69897
	4.77815	5.77815	5.23045
	5.14613	5.77815	5.72428
