# Supplementary material for: The Arabidopsis active demethylase ROS1 cis-regulates defence genes by erasing DNA methylation at promoter-regulatory regions
Source: eLife. 2021 Jan 20;10:e62994. doi: 10.7554/eLife.62994 (PMC7880685; doi:10.7554/eLife.62994)
Supplement: Figure 2—figure supplement 3—source data 1. [file elife-62994-fig2-figsupp3-data1.xlsx]

## Sheet: Feuil1
Figure 2- source data 2
Source data of Figure 2-figure supplement 3
		Relative RMG1 transcript abundance
		Col-0		ros1-3		dcl23		ros1dcl23
		Mock	flg22	Mock	flg22	Mock	flg22	Mock	flg22
		0.814131	49.2938	0.70629	26.0522	0.436282	53.3839	9.76983	66.1805
		1.55653	14.706	0.421421	7.66525	0.634342	33.4361	14.3535	73.1778
		0.789129	42.0296	0.746562	9.90621	0.935191	43.2112		71.1767
		Relative RLP43 transcript abundance
		Col-0		ros1-3		dcl23		ros1dcl23
		Mock	flg22	Mock	flg22	Mock	flg22	Mock	flg22
		0.536506	4.20372	0.0294961	0.0554245	0.880666	5.30248	0.0663696	0.126891
		1.13419	2.19872	0.0433347	0.0230621	0.579013	3.41448	0.0746697	0.146774
		1.64338	6.3496	0.0482498	0.0363139	0.700602	3.93583		0.149339
		Relative RBA1 transcript abundance
		Col-0		ros1-3		dcl23		ros1dcl23
		Mock	flg22	Mock	flg22	Mock	flg22	Mock	flg22
		1.56555	93.4852	0.500578	1.51222	1.34879	20.8455	0.48689	9.89477
		1.2283	63.6314	0.37285	1.66632	0.710382	18.4004	0.947151	18.6573
		0.525465	44.6834	0.340722	2.4909	1.46071	80.8215	1.04367	24.4484
		Relative FRK1 transcript abundance
		Col-0		ros1-3		dcl23		ros1dcl23
		Mock	flg22	Mock	flg22	Mock	flg22	Mock	flg22
		0.935191	42.9127	2.23974	50.6796	0.819794	41.8842	5.12778	42.9127
		1.32715	32.748	2.11893	29.6166	0.73884	31.197	0.985094	57.0175
		0.80571	39.3511	3.83263	59.4388	0.73884	46.3126	5.4768	45.9927
