# Supplementary material for: The Arabidopsis active demethylase ROS1 cis-regulates defence genes by erasing DNA methylation at promoter-regulatory regions
Source: eLife. 2021 Jan 20;10:e62994. doi: 10.7554/eLife.62994 (PMC7880685; doi:10.7554/eLife.62994)
Supplement: Figure 2—source data 1. [file elife-62994-fig2-data1.xlsx]

## Sheet: Feuil1
Figure 2-source data 1
Figure 2A		Relative RMG1 transcript abundance upon flg22
		Col-0	rmg1-1	rmg1-2
		450.901	2.28416	1.52802
		413.478	2.00231	3.72352
		351.326	3.33264	4.79545
Figure 2B	Bacterial propagation in veins Col-0/ros1-3/rmg1-1/rmg1-2
	Rep1						Rep2						Rep3
	Col-0	ros1-3	rmg1-1	rmg1-2			Col-0	ros1-3	rmg1-1	rmg1-2			Col-0	ros1-3	rmg1-1	rmg1-2
	5	5	6	6			1	8	2	4			5	5	5	4
	3	5	5	2			1	13	4	5			6	6	3	3
	2	6	6	7			0	9	4	2			5	17	9	3
	4	3	3	2			1	5	8	5			5	12	7	3
	2	4	3	4			3	7	5	3			3	4	4	2
	1	5	3	3			2	4	6	4			1	9	2	4
	1	5	3	3			2	3	3	1			4	1	4	8
	2	4	14	4			0	11	1	4			5	11	5	4
	1	7	6	1			0	11	1	3			1	11	7	3
	2	5	1	4			1	11	2	1			1	9	6	10
	4	5	1	2			3	4	1	2			0	15	2	6
	3	7	3	6			3	7	11	2			3	12	11	5
													4	5	4	2
													2	5	5	8
													3	9	4	12
													6	4	5	5
Figure 2C	Growth curve Col-0/ros1-3/rmg1-1/rmg1-2
	Rep1						Rep2						Rep3
	Col-0	ros1-3	rmg1-1	rmg1-2			Col-0	ros1-3	rmg1-1	rmg1-2			Col-0	ros1-3	rmg1-1	rmg1-2
	5.25527	6.14613	6.04139	6.27875			5.07918	5.77815	5.50515	5.90309			4.95424	5.30103	5.23045	5.49136
	5.38021	5.90309	6.11394	5.8451			5.30103	6.32222	5.8451	6.32222			4.07918	5.30103	4.8451	5.60206
	5.4624	5.77815	5.8451	5.90309			5.17609	6.20412	6	5.25527			4.5563	5.47712	4.69897	6.04139
	5.36173	5.69897	5.8451	5.32222			5.50515	6.23045	5.50515	5.51851			4.39794	5.60206	5.60206	5.77815
	5.63347	5.77815	5.69897	5.95424			5.57978	5.8451	5.44716	5.57978			5.47712	5.60206	5.60206	4.69897
	5.60206	5.47712	6.11394	6.44716			4.69897	5.95424	5.20412	5.57978			5.11394	5.30103		4.90309
	5.57978	5.60206	6.04139	5.77815			4.30103	5.41497	5.17609	5.11394			5.20412	5.47712
Figure 2F		Relative RMG1 transcript abundance
		Col-0		ros1-3		dcl23		ros1dcl23
		Mock	flg22	Mock	flg22	Mock	flg22	Mock	flg22
		4.56833	161.084	4.20372	42.7149	0.607799	185.679	4.35196	235.024
		0.462225	67.9625	3.55948	71.0945	0.44803	270.909	2.33216	215.518
		0.478525	108.509	3.0773	9.79243	0.883723	184.396	3.20798	277.562
Figure 2G		Relative FRK1 transcript abundance
		Col-0		ros1-3		dcl23		ros1dcl23
		Mock	flg22	Mock	flg22	Mock	flg22	Mock	flg22
		2.35381	278.204	4.21344	243.875	0.481297	265.028	1.31494	236.386
		0.49141	199.466	3.10588	263.197	0.82645	261.379	0.942785	207.217
		0.873573	238.856	11.1579	238.03	0.219912	145.009	2.25793	278.204
