# Supplementary material for: The Arabidopsis active demethylase ROS1 cis-regulates defence genes by erasing DNA methylation at promoter-regulatory regions
Source: eLife. 2021 Jan 20;10:e62994. doi: 10.7554/eLife.62994 (PMC7880685; doi:10.7554/eLife.62994)
Supplement: Figure 3—source data 1. [file elife-62994-fig3-data1.xlsx]

## Sheet: Feuil1
Figure 3-source data 1
Figure 3G		Relative AT1G08940 transcript abundance
		Col-0		ros1-3		dcl23		ros1dcl23
		Mock	flg22	Mock	flg22	Mock	flg22	Mock	flg22
		0.761369	3.02444	0.0786542	0.271057	1.04006	3.10947	0.824543	1.63769
		1.11858	2.50822	0.09289	0.220931	0.880666	2.2217	0.756109	2.4144
		1.17419	3.0773	0.102711	0.217135	0.89917	2.91131		1.77974
Figure 3G		Relative RBA1 transcript abundance
		Col-0		ros1-3		dcl23		ros1dcl23
		Mock	flg22	Mock	flg22	Mock	flg22	Mock	flg22
		1.80625	41.8745	0.0108813	0.0835046	2.27048	11.3766	0.482299	16.089
		1.59438	49.9703	0.00902411	1.46206	0.247929	11.1425	5.74776	6.20315
		0.341037	49.7974	0.48734	0.0835046	0.453131	14.1037	2.03214	15.327
Figure 3G		Relative RLP43 transcript abundance
		Col-0		ros1-3		dcl23		ros1dcl23
		Mock	flg22	Mock	flg22	Mock	flg22	Mock	flg22
		0.864537	5.89708	0.0354026	0.0733022	0.976032	6.1475	0.0984135	0.209497
		1.01045	4.64282	0.0656073	0.0332616	0.617709	3.26029	0.105112	0.150204
		1.14472	6.9163	0.0642571	0.0463914	0.898132	5.18736		0.230846
