# Supplementary material for: The Arabidopsis active demethylase ROS1 cis-regulates defence genes by erasing DNA methylation at promoter-regulatory regions
Source: eLife. 2021 Jan 20;10:e62994. doi: 10.7554/eLife.62994 (PMC7880685; doi:10.7554/eLife.62994)
Supplement: Figure 3—source data 2. [file elife-62994-fig3-data2.xlsx]

## Sheet: Feuil1
Figure 3-source data 2
Figure 3B
Name	Name	Description	Annotation	Col.0_mock	Col.0_flg22	Ros.1_mock	Ros.1_flg22
AT1G05010	ACO4	1-aminocyclopropane-1-carboxylate oxidase 4 [Source:UniProtKB/Swiss-Prot;Acc:Q06588]		3270.79	5197.56	3911.36	3884.64
AT1G08420	BSL2	Serine/threonine-protein phosphatase BSL2 [Source:UniProtKB/Swiss-Prot;Acc:Q9SJF0]		1890.62	2637.2	2012.43	2539.22
AT1G08940		Phosphoglycerate mutase-like protein AT74H [Source:UniProtKB/Swiss-Prot;Acc:O04035]		209.282	1008.33	25.7986	88.0875
AT1G09520		At1g09520/F14J9_18 [Source:UniProtKB/TrEMBL;Acc:O80535]		198.704	309.202	192.737	272.624
AT1G09575		Calcium uniporter protein 6, mitochondrial [Source:UniProtKB/Swiss-Prot;Acc:F4I111]		79.5207	167.438	97.7374	145.461
AT1G13470		Protein of unknown function (DUF1262) [Source:TAIR;Acc:AT1G13470]		297.576	1155.57	153.596	144.521
AT1G21270	WAK2	Wall-associated receptor kinase 2 [Source:UniProtKB/Swiss-Prot;Acc:Q9LMP1]	RLK_genes	1462.64	2257.29	1792.74	1570.64
AT1G23170		Protein of unknown function DUF2359, transmembrane [Source:TAIR;Acc:AT1G23170]		357.094	3726.63	77.0331	319.306
AT1G26390	FOX2	Berberine bridge enzyme-like 4 [Source:UniProtKB/Swiss-Prot;Acc:Q9FZC5]		9.61881	57.7308	19.5802	36.7787
AT1G26410	FOX4	Berberine bridge enzyme-like 6 [Source:UniProtKB/Swiss-Prot;Acc:Q9FZC7]		9.96373	666.457	0.562017	193.885
AT1G44020		Cysteine/Histidine-rich C1 domain family protein [Source:UniProtKB/TrEMBL;Acc:F4IEE1]		0.536503	109.729	0	11.6212
AT1G47370	RBA1	Toll-Interleukin-Resistance (TIR) domain family protein [Source:UniProtKB/TrEMBL;Acc:F4HT77]		30.1221	454.119	50.5275	8.33709
AT1G50920		Nucleolar GTP-binding protein 1 [Source:UniProtKB/Swiss-Prot;Acc:Q9C6I8]		1747.72	2509.24	1843.48	2228.45
AT1G52930	BRIX1-2	Ribosome biogenesis protein BRX1 homolog 2 [Source:UniProtKB/Swiss-Prot;Acc:Q9C928]		245.651	400.821	289.948	371.522
AT1G55610	BRL1	Serine/threonine-protein kinase BRI1-like 1 [Source:UniProtKB/Swiss-Prot;Acc:Q9ZWC8]	RLK_genes	168.506	279.757	191.286	251.137
AT1G60620	ATRPAC43	RNA polymerase I subunit 43 [Source:UniProtKB/TrEMBL;Acc:Q39216]		185.253	272.116	189.02	239.223
AT1G67810	SUFE2	SufE-like protein 2, chloroplastic [Source:UniProtKB/Swiss-Prot;Acc:Q9FXE3]		121.101	622.11	152	367.123
AT1G68760	NUDT1	Nudix hydrolase 1 [Source:UniProtKB/Swiss-Prot;Acc:Q9CA40]		136.851	288.752	167.319	387.273
AT1G69270	RPK1	Probable LRR receptor-like serine/threonine-protein kinase RPK1 [Source:UniProtKB/Swiss-Prot;Acc:Q9ZRF9]	RLK_genes	469.608	692.553	417.545	483.405
AT1G72520	LOX4	Lipoxygenase 4, chloroplastic [Source:UniProtKB/Swiss-Prot;Acc:Q9FNX8]		138.461	360.571	158.327	202.277
AT2G03820		Nonsense-mediated mRNA decay NMD3 family protein [Source:UniProtKB/TrEMBL;Acc:Q9SI58]		1443.75	1919.03	1535.95	1788.39
AT2G06000		Pentatricopeptide repeat-containing protein At2g06000 [Source:UniProtKB/Swiss-Prot;Acc:Q9ZUE9]		221.393	300.597	254.668	277.924
AT2G16510	VHA-c3	V-type proton ATPase subunit c1 [Source:UniProtKB/Swiss-Prot;Acc:P0DH92]		1617.46	2151.48	1613.44	1821.32
AT2G16760		Calcium-dependent phosphotriesterase superfamily protein [Source:UniProtKB/TrEMBL;Acc:Q9SLE2]		1.41793	39.6974	2.73757	11.4996
AT2G17580		Polynucleotide adenylyltransferase family protein [Source:UniProtKB/TrEMBL;Acc:F4INK3]		196.521	306.644	190.308	247.181
AT2G19540		Putative WD-40 repeat protein [Source:UniProtKB/TrEMBL;Acc:Q9ZUN8]		1362.8	1975.85	1514.12	1751.79
AT2G24180	CYP71B6	Cytochrome P450 71B6 [Source:UniProtKB/Swiss-Prot;Acc:O65787]		1564.88	2260.12	1373.45	1651.71
AT2G25850	PAPS2	PAPS2 [Source:UniProtKB/TrEMBL;Acc:A0A178VXR1]		918.033	1304.07	723.793	807.803
AT2G29110	ATGLR2.8	Glutamate receptor [Source:UniProtKB/TrEMBL;Acc:A0A1P8B074]		44.8382	512.023	61.9676	346.241
AT2G29120	GLR2.7	Glutamate receptor 2.7 [Source:UniProtKB/Swiss-Prot;Acc:Q8LGN0]		569.478	1168.27	657.511	801.875
AT2G29470	GSTU3	Glutathione S-transferase U3 [Source:UniProtKB/Swiss-Prot;Acc:Q9ZW28]		0.881423	39.7299	7.4151	22.0021
AT2G30100		Pentatricopeptide repeat-containing protein At2g30100, chloroplastic [Source:UniProtKB/Swiss-Prot;Acc:Q0WNN7]		384.609	622.706	523.514	458.551
AT2G30880		At2g30880/F7F1.9 [Source:UniProtKB/TrEMBL;Acc:Q8VYJ6]		576.763	754.207	619.293	732.22
AT2G31270	CDT1A	CDT1-like protein a, chloroplastic [Source:UniProtKB/Swiss-Prot;Acc:Q9SJW9]		15.2144	40.3151	13.8148	24.7752
AT2G31610	RPS3A	40S ribosomal protein S3-1 [Source:UniProtKB/Swiss-Prot;Acc:Q9SIP7]		1434.7	1943.07	1563.43	1703.13
AT2G32240		FUNCTIONS IN: molecular_function unknown; INVOLVED IN: response to cadmium ion; LOCATED IN: plasma membrane; EXPRESSED IN: 25 plant structures; EXPRESSED DURING: 13 growth stages; CONTAINS InterPro DOMAIN/s: Prefoldin (InterPro:IPR009053); BEST Arab /.../s thaliana protein match is: unknown protein (TAIR:AT1G05320.3); Has 470429 Blast hits to 168274 proteins in 4282 species: Archae - 6896; Bacter…		12846.1	24327	19148.9	28538.3
AT2G32760		At2g32760 [Source:UniProtKB/TrEMBL;Acc:Q8S9J3]		387.218	533.46	333.442	403.255
AT2G32800	LECRKS2	Receptor like protein kinase S.2 [Source:UniProtKB/Swiss-Prot;Acc:O48837]	RLK_genes	2230.54	2909.63	1437.74	1559.53
AT2G34260	WDR55	WD repeat-containing protein 55 [Source:UniProtKB/Swiss-Prot;Acc:O80775]		104.355	172.813	143.587	169.85
AT2G35790		Expressed protein [Source:UniProtKB/TrEMBL;Acc:Q9ZQQ1]		308.844	512.544	367.997	438.068
AT2G36070	TIM44-2	Mitochondrial import inner membrane translocase subunit TIM44-2 [Source:UniProtKB/Swiss-Prot;Acc:Q5XF06]		436.807	632.264	448.511	549.776
AT2G36220		At2g36220/F2H17.17 [Source:UniProtKB/TrEMBL;Acc:Q9SJN3]		806.229	1418.72	730.625	866.657
AT2G36360		Galactose oxidase/kelch repeat superfamily protein [Source:TAIR;Acc:AT2G36360]		723.426	1136.52	748.794	888.412
AT2G36485	ENTH/VHS family protein	obsolete		98.3362	191.215	104.88	144.971
AT2G38670	PECT1	Ethanolamine-phosphate cytidylyltransferase [Source:UniProtKB/Swiss-Prot;Acc:Q9ZVI9]		976.472	1308.84	1044.16	1246.73
AT2G41650		At2g41650 [Source:UniProtKB/TrEMBL;Acc:O22226]		95.5396	148.331	101.182	143.692
AT3G10530		F18K10.11 protein [Source:UniProtKB/TrEMBL;Acc:Q9LPP3]		150.112	255.73	179.012	238.226
AT3G11340	UGT76B1	UDP-glycosyltransferase 76B1 [Source:UniProtKB/Swiss-Prot;Acc:Q9C768]		337.626	5711.62	362.758	2924.1
AT3G16080	RPL37C	60S ribosomal protein L37-3 [Source:UniProtKB/Swiss-Prot;Acc:Q8LEM8]		606.537	883.064	673.827	826.935
AT3G16810	APUM24	Pumilio homolog 24 [Source:UniProtKB/Swiss-Prot;Acc:Q9LRZ3]		254.043	365.274	283.186	344.402
AT3G18370	SYTF	AT3g18370/MYF24_8 [Source:UniProtKB/TrEMBL;Acc:Q93ZM0]		2632.99	4124.83	2720.33	3596.6
AT3G21160	MNS2	Mannosyl-oligosaccharide 1,2-alpha-mannosidase MNS2 [Source:UniProtKB/Swiss-Prot;Acc:Q8H116]		800.644	1098.29	836.215	1020.61
AT3G21520	DMP1	Protein DMP1 [Source:UniProtKB/Swiss-Prot;Acc:Q9LVF4]		21.3071	95.8026	27.8835	37.3901
AT3G24530		AAA-type ATPase family protein / ankyrin repeat family protein [Source:UniProtKB/TrEMBL;Acc:Q9C5C7]		267.496	373.522	298.76	343.105
AT3G26560		Probable pre-mRNA-splicing factor ATP-dependent RNA helicase DEAH5 [Source:UniProtKB/Swiss-Prot;Acc:Q38953]		1182.8	1513.9	1221.67	1472.26
AT3G28890	AtRLP43	Disease resistance protein-like [Source:UniProtKB/TrEMBL;Acc:Q9LJW7]	RLP_genes	24.9862	478.298	7.14313	7.83673
AT3G29200	CM1	Chorismate mutase 1, chloroplastic [Source:UniProtKB/Swiss-Prot;Acc:P42738]		550.395	732.673	544.924	597.283
AT3G29638		General transcription factor 2-related zinc finger protein [Source:UniProtKB/TrEMBL;Acc:F4J480]		1.76285	69.045	0.979012	14.4049
AT3G43920	DCL3	Endoribonuclease Dicer homolog 3 [Source:UniProtKB/Swiss-Prot;Acc:Q9LXW7]		198.591	352.822	169.767	238.122
AT3G46010	ADF1	Actin depolymerizing factor 1 [Source:UniProtKB/TrEMBL;Acc:A8MR09]		2178.94	2803.59	2424.23	2886.7
AT3G47930	GLDH	GLDH [Source:UniProtKB/TrEMBL;Acc:A0A178VN92]		437.958	580.396	537.437	587.642
AT3G53150	UGT73D1	UDP-glucosyl transferase 73D1 [Source:TAIR;Acc:AT3G53150]		21.4222	1122.86	41.1908	669.545
AT3G53160	UGT73C7	Glycosyltransferase (Fragment) [Source:UniProtKB/TrEMBL;Acc:W8Q326]		16.6323	49.5052	20.1059	38.1547
AT3G56710	SIB1	SIB1 [Source:UniProtKB/TrEMBL;Acc:A0A178VMX5]		156.205	497.827	217.467	175.983
AT3G57420	STL2	STELLO2 (Fragment) [Source:UniProtKB/TrEMBL;Acc:A0A1W6AK43]		649.919	956.595	684.052	835.037
AT3G63220	SKIP30	F-box/kelch-repeat protein SKIP30 [Source:UniProtKB/Swiss-Prot;Acc:Q9M1W7]		169.424	249.9	152.598	205.267
AT4G01990		Pentatricopeptide repeat-containing protein At4g01990, mitochondrial [Source:UniProtKB/Swiss-Prot;Acc:Q93WC5]		60.9718	95.77	80.7314	97.9397
AT4G02660		Beige/BEACH domain ;WD domain, G-beta repeat protein [Source:TAIR;Acc:AT4G02660]		53.5762	127.296	61.4417	81.2409
AT4G04450	WRKY42	WRKY transcription factor 42 [Source:UniProtKB/Swiss-Prot;Acc:Q9XEC3]		13.1066	102.912	36.3682	114.829
AT4G11170	RMG1	Putative disease resistance protein At4g11170 [Source:UniProtKB/Swiss-Prot;Acc:O82500]	Resistance_genes	23.7984	3178.91	1.54103	362.697
AT4G12790		AT4G12790 protein [Source:UniProtKB/TrEMBL;Acc:Q8W4C1]		790.184	1261.52	894.938	1146.32
AT4G14630	GLP9	At4g14630 [Source:UniProtKB/TrEMBL;Acc:Q56XY5]		7.01313	255.806	6.65362	91.3363
AT4G15270		Glucosyltransferase-like protein (Fragment) [Source:UniProtKB/TrEMBL;Acc:W8PV66]		3.14252	151.019	4.13358	74.19
AT4G24040	TRE1	Trehalase [Source:UniProtKB/Swiss-Prot;Acc:Q9SU50]		487.279	656.074	601.672	617.546
AT4G26600		S-adenosyl-L-methionine-dependent methyltransferases superfamily protein [Source:TAIR;Acc:AT4G26600]		135.932	189.676	156.731	170.118
AT4G29700		Alkaline-phosphatase-like family protein [Source:UniProtKB/TrEMBL;Acc:Q9SU81]		64.0375	136.009	14.6669	25.5187
AT4G32530		ATPase, F0/V0 complex, subunit C protein [Source:UniProtKB/TrEMBL;Acc:B3H4N3]		1597.77	2055.17	1634.48	2030.2
AT5G03490	UGT89A2	UDP-glycosyltransferase 89A2 [Source:UniProtKB/Swiss-Prot;Acc:Q9LZD8]		270.443	479.393	240.527	329.032
AT5G03610		GDSL esterase/lipase At5g03610 [Source:UniProtKB/Swiss-Prot;Acc:Q9LZS7]		270.063	521.474	285.253	392.154
AT5G05470	EIF2A	Eukaryotic translation initiation factor 2 subunit alpha [Source:UniProtKB/Swiss-Prot;Acc:Q9FE78]		244.884	349.712	248.196	327.571
AT5G07820		Plant calmodulin-binding protein-like protein [Source:UniProtKB/TrEMBL;Acc:Q9SDA2]		600.982	916.594	26.977	26.4049
AT5G09510	RPS15D	40S ribosomal protein S15-4 [Source:UniProtKB/Swiss-Prot;Acc:Q9FY64]		1242.28	1735.3	1231.37	1546.42
AT5G12100		Pentatricopeptide repeat-containing protein At5g12100, mitochondrial [Source:UniProtKB/Swiss-Prot;Acc:Q9FMQ1]		130.222	190.229	183.89	168.585
AT5G20830	SUS1	Sucrose synthase 1 [Source:UniProtKB/Swiss-Prot;Acc:P49040]		1468.92	1974.82	1763.84	2166.38
AT5G23450	ATLCBK1	Long-chain base (LCB) kinase 1 [Source:UniProtKB/TrEMBL;Acc:B3H501]		2617.91	3372.88	2493.89	2922.55
AT5G24210		Alpha/beta-Hydrolases superfamily protein [Source:UniProtKB/TrEMBL;Acc:Q9FNG1]		2031.63	11020.9	1706.45	3653.66
AT5G27060	AtRLP53	receptor like protein 53 [Source:TAIR;Acc:AT5G27060]	RLP_genes	76.0704	2079.96	63.4542	213.218
AT5G28919		Putative uncharacterized protein [Source:UniProtKB/TrEMBL;Acc:Q0WRC3]		1253.09	1619.79	1305.1	1517.13
AT5G28920		unknown protein; Has 0 Blast hits to 0 proteins in 0 species (source: NCBI BLink). [Source:TAIR;Acc:AT5G28920]		1255.88	1619.79	1305.1	1517.76
AT5G38990		Probable receptor-like protein kinase At5g38990 [Source:UniProtKB/Swiss-Prot;Acc:Q9FID9]	RLK_genes	1432.29	2689.27	1474.17	1620.84
AT5G41810		AT5g41810/K16L22_9 [Source:UniProtKB/TrEMBL;Acc:Q9FJ33]		316.357	383.319	342.344	411.037
AT5G42140		Regulator of chromosome condensation (RCC1) family with FYVE zinc finger domain [Source:TAIR;Acc:AT5G42140]		313.866	472.846	382.048	353.358
AT5G43960		Gb [Source:UniProtKB/TrEMBL;Acc:Q9FND0]		1261.82	1579.43	1452.08	1509.2
AT5G45100	BRG1	BOI-related E3 ubiquitin-protein ligase 1 [Source:UniProtKB/Swiss-Prot;Acc:Q9FHE4]		226.681	332.361	219.315	264.081
AT5G47130		Bax inhibitor-1 family protein [Source:TAIR;Acc:AT5G47130]		51.6976	119.07	45.0524	60.0282
AT5G47910	RBOHD	Respiratory burst oxidase homolog protein D [Source:UniProtKB/Swiss-Prot;Acc:Q9FIJ0]		1181.62	1880.95	1138.91	1384.23
AT5G47930	RPS27D	40S ribosomal protein S27-3 [Source:UniProtKB/Swiss-Prot;Acc:Q8L953]		1392.85	1793.95	1303.24	1609.42
AT5G50860		Cyclin-dependent protein kinase-like [Source:UniProtKB/TrEMBL;Acc:Q9LSM7]		561.665	1331.98	599.731	757.499
AT5G53130	CNGC1	Cyclic nucleotide-gated ion channel 1 [Source:UniProtKB/Swiss-Prot;Acc:O65717]		1479.96	3104.73	1475.52	1733.42
AT5G53140		Probable protein phosphatase 2C 76 [Source:UniProtKB/Swiss-Prot;Acc:Q94AT1]		2822.3	4601.97	3150.4	3689.07
AT5G60720		Protein of unknown function, DUF547 [Source:TAIR;Acc:AT5G60720]		18.8934	51.8569	16.4618	16.6742
AT5G62070	IQD23	IQD23 [Source:UniProtKB/TrEMBL;Acc:A0A178UJA3]		468.305	659.098	526.885	636.056
