# Supplementary material for: The Arabidopsis active demethylase ROS1 cis-regulates defence genes by erasing DNA methylation at promoter-regulatory regions
Source: eLife. 2021 Jan 20;10:e62994. doi: 10.7554/eLife.62994 (PMC7880685; doi:10.7554/eLife.62994)
Supplement: Figure 4—source data 1. [file elife-62994-fig4-data1.xlsx]

## Sheet: Feuil1
Figure 4-source data 1
Figure 4E	Relative GUS transcript abundance
	RLP43p::GUS		RLP43p mut::GUS
	Mock	flg22	Mock	flg22
	3.02444	45.0462	3.77986	12.9361
	0.0613554	34.4556	3.05958	5.2537
	6.16172	6.6807	0.0910835	0.782773
	0.406126	29.3102	0.116629	6.32033
	0.538369	2.15846	0.670511	0.231647
	5.23552	6.46806	0.928731	13.2998
	0.110593	28.7071	0.139017	0.422396
	1.04972	2.57279	0.460094	2.6087
	0.131215	18.7654	0.156402	3.42634
	2.90795	0.618423	0.271057	17.0693
	0.0824692	27.7933	6.13331	2.56093
	3.75375	2.04675	0.187288	1.28937
	1.92741	42.8137	0.20829	0.271057
	0.146943	30.2738	0.801996	0.260015
	4.35699	13.4233	0.456916	0.0119239
	1.17283	19.9733	0.0280991	0.375443
		7.04533	0.0375078
