# Supplementary material for: The Arabidopsis active demethylase ROS1 cis-regulates defence genes by erasing DNA methylation at promoter-regulatory regions
Source: eLife. 2021 Jan 20;10:e62994. doi: 10.7554/eLife.62994 (PMC7880685; doi:10.7554/eLife.62994)
Supplement: Figure 5—figure supplement 1—source data 1. [file elife-62994-fig5-figsupp1-data1.xlsx]

## Sheet: Feuil1
Figure 5-source data 2
Figure 5-figure supplement 1
		DAP GST
		RLP43	UBQ	bZIP60
	Col-0	0.296434	1.49049	0.015101
	ros1-3	0.898621	1.2577	1.30205
		DAP WRKY18-GST
		RLP43	UBQ	bZIP60
	Col-0	126.745	13.3224	111.878
	ros1-3	14.0333	22.0206	129.857
		DAP WRKY40-GST
		RLP43	UBQ	bZIP60
	Col-0	33.4929	3.23953	29.977
	ros1-3	5.11872	7.49425	39.4181
