# Supplementary material for: The Arabidopsis active demethylase ROS1 cis-regulates defence genes by erasing DNA methylation at promoter-regulatory regions
Source: eLife. 2021 Jan 20;10:e62994. doi: 10.7554/eLife.62994 (PMC7880685; doi:10.7554/eLife.62994)
Supplement: Figure 5—source data 1. [file elife-62994-fig5-data1.xlsx]

## Sheet: Feuil1
Figure 5-source data 1
		DAP GST
		RLP43	UBQ	bZIP60
	Col-0	0.0473919	0.0899822	0.0748831
	ros1-3	0.75827	0.389794	0.227791
		DAP WRKY18-GST
		RLP43	UBQ	bZIP60
	Col-0	482.968	0.821188	423.373
	ros1-3	12.5602	1.30205	477.973
		DAP WRKY40-GST
		RLP43	UBQ	bZIP60
	Col-0	476.319	1.09489	449.066
	ros1-3	28.9559	1.17755	539.614
