# Supplementary material for: The Arabidopsis active demethylase ROS1 cis-regulates defence genes by erasing DNA methylation at promoter-regulatory regions
Source: eLife. 2021 Jan 20;10:e62994. doi: 10.7554/eLife.62994 (PMC7880685; doi:10.7554/eLife.62994)
Supplement: Figure 6—figure supplement 1—source data 1. [file elife-62994-fig6-figsupp1-data1.xlsx]

## Sheet: Feuil1
Figure 6-source data 2
Source data Figure 6-figure supplement 1
Figure 6-figure supplement 1B		Relative FRK1 transcript abundance
						IR-RMG1p/RLP43p
		Col-0		ros1-3		#1		#2
		Mock	flg22	Mock	flg22	Mock	flg22	Mock	flg22
		1.32409	76.1093	0.117034	104.329	0.194117	127.116	0.239816	103.25
		0.939523	83.8652	1.09809	82.4244	0.200963	76.9047	0.326465	88.9548
		0.803851	85.3311	1.09809	56.493	0.372419	78.7932	0.147113	113.378
		Relative RBA1 transcript abundance
						IR-RMG1p/RLP43p
		Col-0		ros1-3		#1		#2
		Mock	flg22	Mock	flg22	Mock	flg22	Mock	flg22
		1.05093	8.20593	1.47597	0.824543	0.953739	14.9458	1.04729	29.1751
		0.403787	35.5473	1.14605	0.655954	2.72578	22.3417	0.351517	8.9797
		2.35653	16.2421	0.653685	0.118805	0.245138	14.4868	0.49712	25.8424
Figure 6-figure supplement 1C		Relative RMG1 transcript abundance
						IR-RMG1p/RLP43p
		Col-0		ros1-3		#1		#2
		Mock	flg22	Mock	flg22	Mock	flg22	Mock	flg22
		1.47597	364.978	0.375443	6.92429	1.76745	23.0495	0.47522	20.2054
		0.844791	81.3836	1.02574	6.11209	6.61925	9.07355	0.99424	187.62
		0.801996	192.227	0.310285	8.91767	1.68374	10.4953	0.573024	3.34421
		Relative RLP43 transcript abundance
						IR-RMG1p/RLP43p
		Col-0		ros1-3		#1		#2
		Mock	flg22	Mock	flg22	Mock	flg22	Mock	flg22
		0.598739	39.2603	0.0538466	0.184284	0.150726	0.311003	1.20164	8.87655
		0.598739	22.8639	0.138696	0.11744	8.51496	15.0846	0.662045	14.3701
		2.78949	11.1579	0.0507658	0.0669858	2.03496	6.40856	0.0877778	0.235696
