# Supplementary material for: The Arabidopsis active demethylase ROS1 cis-regulates defence genes by erasing DNA methylation at promoter-regulatory regions
Source: eLife. 2021 Jan 20;10:e62994. doi: 10.7554/eLife.62994 (PMC7880685; doi:10.7554/eLife.62994)
Supplement: Figure 6—source data 1. [file elife-62994-fig6-data1.xlsx]

## Sheet: Feuil1
Figure 6-source data 1
Figure 6B		McrBC RLP43
				IR-RMG1p/RLP43p
		Col-0	ros1-3	#1	#2
		78.6841	99.705	96.731	94.4061
		69.8548	99.8638	96.9814	93.2079
		McrBC RMG1
				IR-RMG1p/RLP43p
		Col-0	ros1-3	#1	#2
		56.9227	92.2786	89.7762	89.1933
		25.2575	96.0582	88.1743	85.8389
Figure 6C		Relative RMG1 transcript abundance
						IR-RMG1p/RLP43p
		Col-0		ros1-3		#1		#2
		Mock	flg22	Mock	flg22	Mock	flg22	Mock	flg22
		1.27309	29.2088	0.311722	5.32704	0.227405	5.57253	0.132893	37.6175
		0.591862	33.2051	0.520631	2.00463	0.179037	2.14107	0.343488	3.27918
		1.32715	43.8144	0.919125	5.51489	0.348283	1.55653	0.552227	2.30271
		Relative RLP43 transcript abundance
						IR-RMG1p/RLP43p
		Col-0		ros1-3		#1		#2
		Mock	flg22	Mock	flg22	Mock	flg22	Mock	flg22
		0.99539	10.3987	0.117305	0.083235	0.122711	0.0687896	0.269495	0.0687896
		1.27309	6.01403	0.28094	0.0637396	0.0196182	0.0393725	0.141938	0.0615684
		0.789129	5.23552	0.317171	0.0779306	0.217386	0.0378998	0.207091	0.0732176
Figure 6D		Relative FRK1 transcript abundance
						IR-RMG1p/RLP43p
		Col-0		ros1-3		#1		#2
		Mock	flg22	Mock	flg22	Mock	flg22	Mock	flg22
		3.2303	1754.28	3.6978	1933.06	33.9812	123.783	17.6509	4349.6
		0.147283	697.798	0.686184	1288.67	6.28393	3448.29	15.9631	3228.54
		2.10186	1315.75	0.299716	1385.96	20.4165	2259.31	2.17598	2909.72
		Relative RBA1 transcript abundance
						IR-RMG1p/RLP43p
		Col-0		ros1-3		#1		#2
		Mock	flg22	Mock	flg22	Mock	flg22	Mock	flg22
		1.30737	232.593	0.540238	2.0586	5.60482	84.8397	3.32111	927.155
		0.392746	248.425	0.332555	9.42614	0.507566	676.369	3.00355	420.705
		1.94756	478.265	0.557354	11.8078	3.73645	496.85	2.71635	315.537
Figure 6E
Growth curve Col-0/ros1-3/IR-RMG1pRLP43p
	Rep1						Rep2						Rep3
			IR-RMG1p/RLP43p						IR-RMG1p/RLP43p						IR-RMG1p/RLP43p
	Col-0	ros1-3	#1	#2			Col-0	ros1-3	#1	#2			Col-0	ros1-3	#1	#2
	5.73239	6.5563	6.49136	6			5.60206	6.41497	5.95424	5.77815			4.54407	5	4.47712	5.32222
	5.5682	6.20412	6.07918	5.90309			4.34242	6.34242	5.95424	5.69897			4.07918	5.04139	5.04139	5.17609
	5.44716	6.27875	5.47712	5.8451			4	6.43136	5.8451	5			4.47712	5.47712	4.69897	5.20412
	5.51851	6.36173	5.47712	6			4.17609	5.07918	6.27875	5.17609			4.27875	5.27875	5.8451	5.14613
	5.6902	6.11394	6.04139	5.95424			4	5.27875	4.36173	5.30103			4.95424	5.14613	5.17609	5.27875
	5.30103	6.32222	6.04139	5.90309			5.07918	5.5563	4.39794	5.43136			4.69897	5.32222	4.90309	5.36173
