# Supplementary material for: The Arabidopsis active demethylase ROS1 cis-regulates defence genes by erasing DNA methylation at promoter-regulatory regions
Source: eLife. 2021 Jan 20;10:e62994. doi: 10.7554/eLife.62994 (PMC7880685; doi:10.7554/eLife.62994)
Supplement: Supplementary file 1. [file elife-62994-supp1.xlsx]

## Sheet: Feuil1
DMRWithn2kb|Less Induced	DMR Position		DMRWithn2kb|Less Repressed	DMR Position
AT1G05010	Downstream		AT1G07790	Downstream
AT1G08420	Downstream		AT1G09770	Gene body
AT1G08940	Upstream		AT1G19540	Upstream
AT1G09520	Upstream		AT1G20620	Downstream
AT1G09575	Upstream		AT1G22550	Upstream
AT1G13470	Upstream		AT1G32450	Gene body
AT1G21270	Upstream		AT1G34315	Upstream
AT1G23170	Upstream		AT1G34780	Upstream
AT1G26390	Gene body		AT1G48840	Gene body
AT1G26410	Gene body		AT1G50040	Upstream
AT1G44020	Upstream		AT1G51440	Downstream
AT1G47370	Upstream		AT1G52000	Upstream
AT1G50920	Downstream		AT1G52410	Downstream
AT1G52930	Downstream		AT1G56170	Upstream
AT1G55610	Gene body		AT1G61600	Upstream
AT1G60620	Upstream		AT1G65590	Upstream
AT1G67810	Downstream		AT1G67590	Downstream
AT1G68760	Downstream		AT1G67870	Upstream
AT1G69270	Gene body		AT1G69260	Gene body
AT1G72520	Gene body		AT1G76510	Downstream
AT2G03820	Upstream		AT1G79160	Upstream
AT2G06000	Downstream		AT1G79500	Upstream
AT2G16510	Upstream		AT2G02160	Upstream
AT2G16760	Downstream		AT2G03380	Upstream
AT2G17580	Downstream		AT2G04560	Upstream
AT2G19540	Downstream		AT2G05380	Upstream
AT2G24180	Downstream		AT2G14800	Upstream
AT2G25850	Gene body		AT2G20300	Downstream
AT2G29110	Gene body		AT2G21660	Downstream
AT2G29120	Gene body		AT2G21880	Downstream
AT2G29470	Downstream		AT2G24100	Gene body
AT2G30100	Gene body		AT2G24650	Upstream
AT2G30880	Gene body		AT2G25710	Upstream
AT2G31270	Gene body		AT2G25790	Downstream
AT2G31610	Gene body		AT2G26100	Downstream
AT2G32240	Gene body		AT2G26690	Downstream
AT2G32760	Gene body		AT2G27060	Upstream
AT2G32800	Gene body		AT2G28230	Upstream
AT2G34260	Gene body		AT2G29300	Gene body
AT2G35790	Gene body		AT2G29525	Gene body
AT2G36070	Gene body		AT2G29890	Gene body
AT2G36220	Downstream		AT2G30800	Upstream
AT2G36360	Gene body		AT2G32160	Gene body
AT2G36485	Upstream		AT2G33830	Upstream
AT2G38670	Downstream		AT2G34420	Gene body
AT2G41650	Gene body		AT2G34430	Gene body
AT3G10530	Gene body		AT2G34450	Gene body
AT3G11340	Downstream		AT2G34780	Gene body
AT3G16080	Upstream		AT2G34930	Gene body
AT3G16810	Upstream		AT2G36240	Gene body
AT3G18370	Gene body		AT2G37840	Upstream
AT3G21160	Upstream		AT2G39730	Upstream
AT3G21520	Gene body		AT2G45380	Upstream
AT3G24530	Downstream		AT3G07140	Upstream
AT3G26560	Upstream		AT3G09160	Upstream
AT3G28890	Upstream		AT3G09162	Gene body
AT3G29200	Downstream		AT3G15260	Upstream
AT3G29638	Gene body		AT3G16240	Upstream
AT3G43920	Upstream		AT3G21390	Upstream
AT3G46010	Upstream		AT3G23090	Downstream
AT3G47930	Upstream		AT3G23450	Gene body
AT3G53150	Upstream		AT3G26510	Gene body
AT3G53160	Downstream		AT3G27980	Gene body
AT3G56710	Upstream		AT3G28220	Gene body
AT3G57420	Gene body		AT3G28420	Downstream
AT3G63220	Gene body		AT3G28920	Upstream
AT4G01990	Downstream		AT3G29130	Gene body
AT4G02660	Upstream		AT3G29680	Upstream
AT4G04450	Gene body		AT3G46580	Upstream
AT4G11170	Upstream		AT3G46590	Upstream
AT4G12790	Upstream		AT3G48390	Gene body
AT4G14630	Gene body		AT3G48410	Upstream
AT4G15270	Upstream		AT3G50380	Upstream
AT4G24040	Upstream		AT3G50750	Upstream
AT4G26600	Upstream		AT3G51860	Gene body
AT4G29700	Upstream		AT3G56080	Downstream
AT4G32530	Upstream		AT3G58590	Upstream
AT5G03490	Gene body		AT3G61210	Upstream
AT5G03610	Downstream		AT3G61600	Upstream
AT5G05470	Upstream		AT3G62499	Upstream
AT5G07820	Upstream		AT4G01330	Downstream
AT5G09510	Upstream		AT4G12420	Downstream
AT5G12100	Upstream		AT4G12560	Downstream
AT5G20830	Downstream		AT4G12990	Upstream
AT5G23450	Upstream		AT4G14000	Upstream
AT5G24210	Upstream		AT4G15210	Upstream
AT5G27060	Upstream		AT4G16900	Gene body
AT5G28919	Downstream		AT4G18375	Downstream
AT5G28920	Downstream		AT4G18600	Upstream
AT5G38990	Gene body		AT4G18780	Upstream
AT5G41810	Upstream		AT4G19530	Upstream
AT5G42140	Gene body		AT4G21326	Gene body
AT5G43960	Downstream		AT4G26140	Upstream
AT5G45100	Upstream		AT4G27260	Upstream
AT5G47130	Upstream		AT4G35780	Upstream
AT5G47910	Gene body		AT5G02370	Upstream
AT5G47930	Upstream		AT5G05430	Upstream
AT5G50860	Upstream		AT5G17310	Upstream
AT5G53130	Upstream		AT5G21140	Upstream
AT5G53140	Upstream		AT5G23940	Downstream
AT5G60720	Downstream		AT5G23950	Upstream
AT5G62070	Downstream		AT5G24490	Gene body
			AT5G25560	Upstream
			AT5G27950	Downstream
			AT5G34850	Upstream
			AT5G35930	Upstream
			AT5G40600	Upstream
			AT5G45940	Upstream
			AT5G48150	Upstream
			AT5G49215	Upstream
			AT5G49440	Gene body
			AT5G54250	Upstream
			AT5G57360	Upstream
			AT5G64900	Upstream
			AT5G65683	Upstream
